# Supplementary material for: Molecular Mechanisms in the Activation of Abscisic Acid Receptor PYR1
Source: PubMed Central journal article supplement (PMC3694813; doi:10.1371/journal.pcbi.1003114), 2013-06-27
Supplement: pcbi.1003114.s013.pdf [file pcbi.1003114.s013.pdf]

Nearest inter-molecular neighbors in complexes of PYR/PYL ABA receptors with HAB1.  
 Pink - receptor's residues; white - neighbor HAB1 residues; green - neighbor ABA molecules.

| I                                                                               | La3β2 |      |      | β2   |      |      | Gate |      |      |      |      |      |      |      | Latch |      |      |      |      | Lβ7α5 |      |      |      |      | Helix α5 |      |      |      |      |      |      |      |      |      |      |      |      |      |      |      |      |      |      |      |      |      |      |      |
|---------------------------------------------------------------------------------|-------|------|------|------|------|------|------|------|------|------|------|------|------|------|-------|------|------|------|------|-------|------|------|------|------|----------|------|------|------|------|------|------|------|------|------|------|------|------|------|------|------|------|------|------|------|------|------|------|------|
|                                                                                 | K59   | H60  | F61  | I62  | K63  | S64  | V81  | I82  | V83  | I84  | S85  | G86  | L87  | P88  | A89   | N90  | T91  | S92  | E94  | F108  | I110 | G114 | H115 | R116 | L117     | Y120 | S122 | E141 | P148 | G150 | N151 | S152 | D154 | D155 | T156 | M158 | F159 | A160 | T162 | V163 | V164 | L166 | N167 | Q169 | K170 |      |      |      |
| PYR1-ABA-HAB1<br>3QN1.pdb<br>[17]                                               | ABA   | S322 | ABA  |      | S200 |      | ABA  |      | ABA  | G246 | R199 | H245 | ABA  | ABA  | ABA   |      | ABA  | ABA  | ABA  | ABA   | ABA  | ABA  | ABA  | ABA  | ABA      | ABA  | ABA  | ABA  | W385 | I383 |      |      | I383 | W385 | W385 | K381 | ABA  | ABA  | F391 | ABA  | ABA  | E323 | ABA  |      |      |      |      |      |
|                                                                                 |       | T324 | T324 |      | E201 |      |      |      |      | T324 | E203 | G246 | Q386 | W385 | Q386  |      |      |      |      |       |      |      |      | Q384 | W385     |      |      |      |      |      | Q384 |      |      | W385 |      | I383 | I383 |      |      | V393 |      |      | T324 |      |      |      |      |      |
|                                                                                 |       |      | V393 |      |      |      |      |      |      |      | G244 | R389 | R389 | Q386 |       |      |      |      |      |       |      |      |      | W385 | W385     |      |      |      |      |      | W385 |      |      |      |      | F391 | W385 |      |      | Y404 |      |      | Y404 |      |      |      |      |      |
|                                                                                 |       |      | Y404 |      |      |      |      |      |      |      | H245 | V393 | V393 | R389 |       |      |      |      |      |       |      |      |      | Q386 |          |      |      |      |      |      |      |      |      |      |      |      | F391 |      |      | L405 |      |      |      |      |      |      |      |      |
|                                                                                 |       |      |      |      |      |      |      |      |      |      | G246 | L394 |      | G392 |       |      |      |      |      |       |      |      |      |      |          |      |      |      |      |      |      |      |      |      |      |      | G392 |      |      |      |      |      |      |      |      |      |      |      |
|                                                                                 |       |      |      |      |      |      |      |      |      |      | G247 | A395 |      | V393 |       |      |      |      |      |       |      |      |      |      |          |      |      |      |      |      |      |      |      |      |      |      | V393 |      |      |      |      |      |      |      |      |      |      |      |
| II                                                                              | M1    | K59  |      | F61  | I62  |      |      | V81  |      | V83  | I84  | S85  | G86  | L87  | P88   | A89  | N90  | T91  | S92  | E94   | F108 | I110 | G114 | H115 | R116     | L117 | Y120 | S122 | E141 |      |      |      |      | S152 | D154 | D155 | T156 | M158 | F159 | A160 | T162 | V163 | V164 | L166 | N167 | Q169 |      |      |
| PYR1-ABA-HAB1<br>3QN1.pdb<br>& recovered<br>after 30 ns                         | E320  | ABA  |      | ABA  | ABA  |      |      | ABA  |      | ABA  | W382 | W382 | Q381 | ABA  | ABA   | ABA  | ABA  | ABA  | ABA  | ABA   | ABA  | ABA  | ABA  | ABA  | ABA      | ABA  | ABA  | ABA  | ABA  |      |      |      |      | K378 | G377 | K378 | G376 | G376 | G376 | G376 | ABA  | ABA  | W382 | ABA  | ABA  | W382 | ABA  | Q320 |
|                                                                                 | T321  |      |      | W382 |      |      |      |      |      |      |      | W382 | W382 | I380 |       |      |      |      |      |       |      |      |      | I380 |          |      |      |      |      |      |      |      |      |      |      |      |      |      |      |      |      |      |      |      |      |      |      |      |
|                                                                                 | R400  |      |      | V390 |      |      |      |      |      |      |      | Q383 | Q383 | Q381 |       |      |      |      |      |       |      |      |      | Q381 |          |      |      |      |      |      |      |      |      | I380 |      |      |      |      |      |      |      |      |      |      |      |      |      |      |
|                                                                                 | Y401  |      |      |      |      |      |      |      |      |      |      | R386 |      | W382 |       |      |      |      |      |       |      |      |      |      |          |      |      |      |      |      |      |      |      |      |      |      |      |      |      |      |      |      |      |      |      |      |      |      |
|                                                                                 |       |      |      |      |      |      |      |      |      |      |      |      |      |      | Q383  |      |      |      |      |       |      |      |      |      |          |      |      |      |      |      |      |      |      |      |      |      |      |      |      |      |      |      |      |      |      |      |      |      |
|                                                                                 |       |      |      |      |      |      |      |      |      |      |      |      |      |      |       |      |      |      |      |       |      |      |      |      |          |      |      |      |      |      |      |      |      |      |      |      |      |      |      |      |      |      |      |      |      |      |      |      |
| III                                                                             | H39   | K59  | H60  | F61  | I62  | K63  | S64  |      |      |      | I84  | S85  |      |      |       |      |      |      |      |       |      |      |      |      |          |      |      |      | E132 | N133 | R134 |      |      |      |      |      |      |      |      |      |      |      |      |      | L166 | K170 | E176 | R180 |
| PYR1-HAB1<br>3QN1.pdb<br>ABA-extracted<br>shifted<br>& recovered<br>after 30 ns | K285  | N374 | D367 | N374 | N374 | I372 | G376 |      |      |      | I84  | S85  |      |      |       |      |      |      |      |       |      |      |      |      |          |      |      |      |      |      |      |      |      |      |      |      |      |      |      |      |      |      |      |      |      |      |      |      |
|                                                                                 | E277  |      | A370 |      |      |      |      |      |      |      | N374 | E373 |      |      |       |      |      |      |      |       |      |      |      |      |          |      |      |      |      |      |      |      |      |      |      |      |      |      |      |      |      |      |      |      |      |      |      |      |
|                                                                                 |       |      | R371 |      |      |      |      |      |      |      |      | N374 | E373 |      |       |      |      |      |      |       |      |      |      |      |          |      |      |      |      |      |      |      |      |      |      |      |      |      |      |      |      |      |      |      |      |      |      |      |
|                                                                                 |       |      | N374 |      |      |      |      |      |      |      |      | A375 |      |      |       |      |      |      |      |       |      |      |      |      |          |      |      |      |      |      |      |      |      |      |      |      |      |      |      |      |      |      |      |      |      |      |      |      |
|                                                                                 |       |      |      |      |      |      |      |      |      |      |      | G376 |      |      |       |      |      |      |      |       |      |      |      |      |          |      |      |      |      |      |      |      |      |      |      |      |      |      |      |      |      |      |      |      |      |      |      |      |
|                                                                                 |       |      |      |      |      |      |      |      |      |      |      | G377 |      |      |       |      |      |      |      |       |      |      |      |      |          |      |      |      |      |      |      |      |      |      |      |      |      |      |      |      |      |      |      |      |      |      |      |      |
| IV                                                                              |       | K59  | P60  | F61  |      | K63  |      |      |      |      | V83  | I84  | S85  | G86  | L87   | P88  | A89  |      | T91  | S92   | E94  | F108 | I110 |      | H115     | R116 | L117 | Y120 |      | E141 | P148 |      | N151 |      | D155 | T156 | M158 | F159 | A160 | T162 | V163 | V164 | L166 | N167 | K170 |      |      |      |
| PYR1-ABA-HAB1<br>3ZVU.pdb<br>mutant H60P<br>[16]                                | ABA   | S322 | ABA  |      | S200 |      |      |      |      | ABA  | G246 | R199 | H245 | ABA  | ABA   | ABA  |      | ABA  | ABA  | ABA   | ABA  | ABA  | ABA  | ABA  | ABA      | ABA  | ABA  | ABA  | ABA  | W385 | I383 |      |      | K381 | W385 | W385 | K381 | ABA  | ABA  | F391 | ABA  | ABA  | E323 | ABA  |      | S322 |      |      |
|                                                                                 |       |      | E323 | T324 |      | E201 |      |      |      |      | G247 | E203 | G246 | Q386 | W385  | Q386 |      |      |      |       |      |      |      | W385 | W385     |      |      |      |      |      | Q384 |      |      | I383 |      | I383 | I383 |      |      | V393 | V393 |      | W324 |      | E323 |      |      |      |
|                                                                                 |       |      | T324 | V393 |      |      |      |      |      |      | T324 | G244 | G246 | R389 | Q386  |      |      |      |      |       |      |      |      | Q386 |          |      |      |      |      |      | W385 |      |      | W385 |      | F391 | W385 |      |      | Y404 |      |      | Y404 |      |      |      |      |      |
|                                                                                 |       |      |      | Y404 |      |      |      |      |      |      |      | H245 | V393 | V393 | R389  |      |      |      |      |       |      |      |      |      |          |      |      |      |      |      |      |      |      |      |      |      |      |      |      |      |      |      |      |      |      |      |      |      |
|                                                                                 |       |      |      |      |      |      |      |      |      |      |      | G246 | L394 |      | G392  |      |      |      |      |       |      |      |      |      |          |      |      |      |      |      |      |      |      |      |      |      |      |      |      |      |      |      |      |      |      |      |      |      |
|                                                                                 |       |      |      |      |      |      |      |      |      |      |      | G247 | A395 |      | V393  |      |      |      |      |       |      |      |      |      |          |      |      |      |      |      |      |      |      |      |      |      |      |      |      |      |      |      |      |      |      |      |      |      |
| V                                                                               |       |      | K64  | H65  | F66  |      | K68  | R69  | V85  | V87  | I88  | S89  | G90  | L91  | P92   | A93  |      | T95  | S96  | E98   | F112 | V114 |      | H119 | R120     | L121 | Y124 | S126 | E147 | P154 |      | N157 |      | D161 | T162 | M164 | F165 | V166 | T168 | V169 | V170 | L172 | N173 | K176 |      |      |      |      |
| PYL2-ABA-HAB1<br>3KB3.pdb<br>[11]                                               |       |      | ABA  | S322 | ABA  |      | S200 | E201 | ABA  | ABA  | G246 | R199 | R199 | ABA  | ABA   | ABA  |      | ABA  | ABA  | ABA   | ABA  | ABA  | ABA  | ABA  | ABA      | ABA  | ABA  | ABA  | ABA  | W385 | I383 |      |      | K381 | W385 | W385 | K381 | ABA  | ABA  | F391 | ABA  | ABA  | E323 | ABA  |      | E323 |      |      |
|                                                                                 |       |      |      | E323 | T324 |      | E201 |      |      |      | T324 | E203 | H245 | Q386 | W385  | Q386 |      |      |      |       |      |      |      | W385 | W385     |      |      |      |      |      | Q384 |      |      | I383 |      | I383 | I383 |      |      | V393 | V393 |      | Y404 |      |      |      |      |      |
|                                                                                 |       |      |      | T324 | V393 |      |      |      |      |      |      | G244 | G246 | R389 | Q386  |      |      |      |      |       |      |      |      | Q386 |          |      |      |      |      |      | W385 |      |      | W385 |      | F391 | W385 |      |      | Y404 |      |      |      |      |      |      |      |      |
|                                                                                 |       |      |      | Y404 |      |      |      |      |      |      |      | H245 | R389 | V393 | R389  |      |      |      |      |       |      |      |      |      |          |      |      |      |      |      |      |      |      |      |      |      |      |      |      |      |      |      |      |      |      |      |      |      |
|                                                                                 |       |      |      |      |      |      |      |      |      |      |      | G246 | V393 |      | G392  |      |      |      |      |       |      |      |      |      |          |      |      |      |      |      |      |      |      |      |      |      |      |      |      |      |      |      |      |      |      |      |      |      |
|                                                                                 |       |      |      |      |      |      |      |      |      |      |      | G247 | L394 |      | V393  |      |      |      |      |       |      |      |      |      |          |      |      |      |      |      |      |      |      |      |      |      |      |      |      |      |      |      |      |      |      |      |      |      |
| VI                                                                              |       |      | K79  | H80  | F81  | I82  | K83  |      |      |      | V107 | I108 | S109 | G110 | L111  | P112 | A113 |      | T115 | S116  | E118 | F132 | V134 |      | H139     | R140 | L141 | Y144 | S146 | E170 | P177 |      | N180 |      | D184 | T185 | M187 | F188 | V189 | T191 | V192 | V193 | S195 | N196 | Q198 | N199 |      |      |
| PYL3-ABA-HAB1<br>4DS8.pdb<br>[38]                                               |       |      | ABA  | S322 | ABA  | ABA  | E201 |      |      |      | ABA  | G246 | R199 | H245 | ABA   | ABA  | ABA  |      | ABA  | ABA   | ABA  | ABA  | ABA  | ABA  | ABA      | ABA  | ABA  | ABA  | ABA  | W385 | I383 |      |      | I383 | W385 | W385 | K381 | ABA  | ABA  | F391 | ABA  | ABA  | E323 | ABA  |      | E323 |      |      |
|                                                                                 |       |      |      | E323 | T324 |      |      |      |      |      | T324 | E201 | G246 | Q386 | W385  | Q386 |      |      |      |       |      |      |      | Q384 | W385     |      |      |      |      |      | Q384 |      |      | W385 |      | I383 | I383 |      |      | V393 | V393 |      | Y404 |      |      |      |      |      |
|                                                                                 |       |      |      | T324 | V393 |      |      |      |      |      |      | E203 | R389 | R389 | Q386  |      |      |      |      |       |      |      |      | W385 | W385     |      |      |      |      |      | W385 |      |      |      |      |      |      |      |      |      |      |      |      |      |      |      |      |      |
|                                                                                 |       |      |      | Y404 |      |      |      |      |      |      |      | H245 | V393 | V393 | R389  |      |      |      |      |       |      |      |      | Q386 |          |      |      |      |      |      |      |      |      |      |      |      |      |      |      |      |      |      |      |      |      |      |      |      |
|                                                                                 |       |      |      |      |      |      |      |      |      |      |      | G246 | L394 | Y404 | G392  |      |      |      |      |       |      |      |      |      |          |      |      |      |      |      |      |      |      |      |      |      |      |      |      |      |      |      |      |      |      |      |      |      |
|                                                                                 |       |      |      |      |      |      |      |      |      |      |      | G247 | A395 |      | V393  |      |      |      |      |       |      |      |      |      |          |      |      |      |      |      |      |      |      |      |      |      |      |      |      |      |      |      |      |      |      |      |      |      |
| VII                                                                             |       |      |      | P57  | F58  |      | S60  | R61  | D78  | L79  | K80  | S81  | G82  | L83  | P84   | A85  | T86  |      |      |       |      |      |      | D110 | R112     | L113 |      |      |      | P144 | N147 |      | E151 | T152 | F154 | F155 |      | A158 | L159 | Q161 | C162 |      | N165 |      |      |      |      |      |
| PYL10-HAB1<br>3RT0.pdb<br>ABA-free<br>[15]                                      |       |      |      | G246 | G246 |      | E201 | S200 | S200 | R199 | R199 | R199 | H245 | Q386 | W385  | R199 | R199 |      |      |       |      |      |      | Q386 | Q384     | W385 |      |      |      | W385 | I383 |      | V382 | W385 | W385 | K381 | I383 |      | F391 | V393 | E323 | E323 |      | E323 |      |      |      |      |
|                                                                                 |       |      |      | S322 | T324 |      | S200 |      |      |      |      | E201 | E203 | R389 | R389  | Q386 | Q386 | K491 |      |       |      |      |      |      | W385     |      |      |      |      |      | Q384 |      |      | I383 |      | I383 | W385 |      |      | V393 |      |      | T324 |      |      |      |      |      |
|                                                                                 |       |      |      | T324 | V393 |      |      |      |      |      |      | E203 | D243 | V393 | V393  | R389 |      |      |      |       |      |      |      | Q386 |          |      |      |      |      |      | W385 |      |      | Q384 |      | F391 | F391 |      |      |      |      |      | Y404 |      |      |      |      |      |
|                                                                                 |       |      |      | Y404 |      |      |      |      |      |      |      | G246 | G244 | L394 |       | G392 |      |      |      |       |      |      |      |      |          |      |      |      |      |      |      |      |      |      |      |      |      |      |      |      |      |      |      |      |      |      |      |      |
|                                                                                 |       |      |      |      |      |      |      |      |      |      |      | G247 | H245 | A395 |       | V393 |      |      |      |       |      |      |      |      |          |      |      |      |      |      |      |      |      |      |      |      |      |      |      |      |      |      |      |      |      |      |      |      |
